1 **DPHL: A pan-human protein mass spectrometry library for robust biomarker**  
2 **discovery**

3

4 Tiansheng Zhu<sup>1,2,30</sup> #, Yi Zhu<sup>1,2</sup> #, Yue Xuan<sup>3</sup> #, Huanhuan Gao<sup>1,2</sup>, Xue Cai<sup>1,2</sup>, Sander R.  
5 Piersma<sup>4</sup>, Thang V. Pham<sup>4</sup>, Tim Schelfhorst<sup>4</sup>, Richard R Goeij De Haas<sup>4</sup>, Irene V.  
6 Bijnsdorp<sup>4,5</sup>, Rui Sun<sup>1,2</sup>, Liang Yue<sup>1,2</sup>, Guan Ruan<sup>1,2</sup>, Qiushi Zhang<sup>1,2</sup>, Mo Hu<sup>6</sup>, Yue Zhou<sup>6</sup>,  
7 Winan J. Van Houdt<sup>7</sup>, T.Y.S Lelarge<sup>8</sup>, J. Cloos<sup>9</sup>, Anna Wojtuszkiewicz<sup>9</sup>, Danijela Koppers-  
8 Lalic<sup>10</sup>, Franziska Böttger<sup>11</sup>, Chantal Scheepbouwer<sup>12,13</sup>, R.H Brakenhoff<sup>14</sup>, G.J.L.H. van  
9 Leenders<sup>15</sup>, Jan N.M. Ijzermans<sup>16</sup>, J.W.M. Martens<sup>17</sup>, R.D.M. Steenbergen<sup>13</sup>, N.C. Grieken<sup>13</sup>,  
10 Sathiyamoorthy Selvarajan<sup>18</sup>, Sangeeta Mantoo<sup>18</sup>, Sze Sing Lee<sup>19</sup>, Serene Jie Yi Yeow<sup>19</sup>,  
11 Syed Muhammad Fahmy Alkaff<sup>18</sup>, Nan Xiang<sup>1,2</sup>, Yaoting Sun<sup>1,2</sup>, Xiao Yi<sup>1,2</sup>, Shaozheng Dai<sup>20</sup>,  
12 Wei Liu<sup>1,2</sup>, Tian Lu<sup>1,2</sup>, Zhicheng Wu<sup>1,2,30</sup>, Xiao Liang<sup>1,2</sup>, Man Wang<sup>21</sup>, Yingkuan Shao<sup>22</sup>, Xi  
13 Zheng<sup>22</sup>, Kailun Xu<sup>22</sup>, Qin Yang<sup>23</sup>, Yifan Meng<sup>23</sup>, Cong Lu<sup>24</sup>, Jiang Zhu<sup>24</sup>, Jin'e Zheng<sup>24</sup>, Bo  
14 Wang<sup>25</sup>, Sai Lou<sup>26</sup>, Yibei Dai<sup>27</sup>, Chao Xu<sup>28</sup>, Chenhuan Yu<sup>29</sup>, Huazhong Ying<sup>29</sup>, Tony Kiat-hon  
15 Lim<sup>18</sup>, Jianmin Wu<sup>21</sup>, Xiaofei Gao<sup>1,2</sup>, Zhongzhi Luan<sup>20</sup>, Xiaodong Teng<sup>25</sup>, Peng Wu<sup>23</sup>, Shi'ang  
16 Huang<sup>24</sup>, Zhihua Tao<sup>27</sup>, N. Gopalakrishna Iyer<sup>19</sup>, Shuigeng Zhou<sup>30</sup>, Wenguang Shao<sup>31</sup>, Henry  
17 Lam<sup>32</sup>, Ding Ma<sup>23</sup>, Jiafu Ji<sup>21</sup>, Oi Lian Kon<sup>19</sup>, Shu Zheng<sup>22</sup>, Ruedi Aebersold<sup>31,33</sup>, Connie R.  
18 Jimenez<sup>4</sup>, Tiannan Guo<sup>1,2\*</sup>

19 <sup>1</sup>School of Life Sciences, Westlake University, Hangzhou, Zhejiang, China, <sup>2</sup>Institute of Basic  
20 Medical Sciences, Westlake Institute for Advanced Study, Hangzhou, Zhejiang, China,  
21 <sup>3</sup>ThermoFisher Scientific (BREMEN) GmbH, Bremen, Germany, <sup>4</sup>OncoProteomics  
22 Laboratory, Dept. of Medical Oncology, VU University Medical Center, VU University  
23 Amsterdam, Amsterdam, The Netherlands, <sup>5</sup>Amsterdam UMC, Vrije Universiteit Amsterdam,  
24 Urology, Cancer Center Amsterdam, Amsterdam, The Netherlands, <sup>6</sup>Thermo Fisher  
25 Scientific, Shanghai, China, <sup>7</sup>The Netherlands Cancer Institute, Surgical Oncology,  
26 Amsterdam, The Netherlands, <sup>8</sup>Amsterdam UMC, Vrije Universiteit Amsterdam, Surgery,  
27 Cancer Center Amsterdam, The Netherlands, <sup>9</sup>Amsterdam UMC, Vrije Universiteit  
28 Amsterdam, Pediatric Oncology/Hematology, Cancer Center Amsterdam, The Netherlands,  
29 <sup>10</sup>Amsterdam UMC, Vrije Universiteit Amsterdam, Hematology, Cancer Center Amsterdam,  
30 The Netherlands, <sup>11</sup>Amsterdam UMC, Vrije Universiteit Amsterdam, Medical Oncology,  
31 Cancer Center Amsterdam, The Netherlands, <sup>12</sup>Amsterdam UMC, Vrije Universiteit  
32 Amsterdam, Neurosurgery, Cancer Center Amsterdam, The Netherlands, <sup>13</sup>Amsterdam  
33 UMC, Vrije Universiteit Amsterdam, Pathology, Cancer Center Amsterdam, Amsterdam, The  
34 Netherlands, <sup>14</sup>Amsterdam UMC, Vrije Universiteit Amsterdam, Otolaryngology / head and  
35 neck surgery, Cancer Center Amsterdam, The Netherlands, <sup>15</sup>Erasmus MC University  
36 Medical Center, Pathology, Rotterdam, The Netherlands, <sup>16</sup>Erasmus MC University Medical  
37 Center, Surgery, Rotterdam, Netherlands, <sup>17</sup>Erasmus MC University Medical Center, Medical  
38 Oncology, Rotterdam, Netherlands, <sup>18</sup>Department of Anatomical Pathology, Singapore  
39 General Hospital, Singapore, <sup>19</sup>Division of Medical Sciences, National Cancer Centre  
40 Singapore, Singapore, <sup>20</sup>School of Computer Science and Engineering, Beihang University,  
41 Beijing, China, <sup>21</sup>Key laboratory of Carcinogenesis and Translational Research (Ministry of  
42 Education), Department of Gastrointestinal Translational Research, Peking University  
43 Cancer Hospital, Beijing, China, <sup>22</sup>Cancer Institute, Key Laboratory of Cancer Prevention  
44 and Intervention, China National Ministry of Education, Key Laboratory of Molecular Biology  
45 in Medical Sciences; The Second Affiliated Hospital, Zhejiang University School of Medicine,  
46 Hangzhou, Zhejiang, China, <sup>23</sup>Cancer Biology Research Center (Key laboratory of the  
47 ministry of education), Tongji Hospital, Tongji Medical College, Huazhong University of  
48 Science and Technology, Wuhan, Hubei, China, <sup>24</sup>Center for Stem Cell Research and  
49 Application, Union Hospital, Tongji Medical College, Huazhong University of Science and  
50 Technology, Wuhan, Hubei, China, <sup>25</sup>Department of Pathology, The First Affiliated Hospital,  
51 Zhejiang University School of Medicine, Hangzhou, Zhejiang, China, <sup>26</sup>Phase I Clinical  
52 Research Center, Zhejiang Provincial People's Hospital, Hangzhou, Zhejiang, China,  
53 <sup>27</sup>Department of Laboratory Medicine, The Second Affiliated Hospital, Zhejiang University

54 School of Medicine, Hangzhou, Zhejiang, China,<sup>28</sup>College of Mathematics and Informatics,  
55 Digital Fujian Institute of Big Data Security Technology, Fujian Normal University, Fuzhou,  
56 China,<sup>29</sup>Key Laboratory of Experimental Animal and Safety Evaluation, Zhejiang Academy  
57 of Medical Sciences, Hangzhou, Zhejiang, China,<sup>30</sup>School of Computer Science, and  
58 Shanghai Key Lab of Intelligent Information Processing, Fudan University, Shanghai, China,  
59<sup>31</sup>Department of Biology, Institute for Molecular Systems Biology, ETH Zurich, Switzerland,  
60<sup>32</sup>Department of Chemical and Biological Engineering, The Hong Kong University of Science  
61 & Technology, Clear Water Bay, Kowloon, Hong Kong, China,<sup>33</sup>Faculty of Science,  
62 University of Zurich, Switzerland.

63

64 \* To whom correspondence should be addressed. Tel: +86 752 86886875; Email:  
65 [guotiannan@westlake.edu.cn](mailto:guotiannan@westlake.edu.cn)

66 #, The authors wish it to be known that, in their opinion, the first three authors should be  
67 regarded as joint First Authors.

68

## 69 **ABSTRACT**

70 To answer the increasing need for detecting and validating protein biomarkers in  
71 clinical specimens, proteomic techniques are required that support the fast, reproducible and  
72 quantitative analysis of large clinical sample cohorts. Targeted mass spectrometry  
73 techniques, specifically SRM, PRM and the massively parallel SWATH/DIA technique have  
74 emerged as a powerful method for biomarker research. For optimal performance, they  
75 require prior knowledge about the fragment ion spectra of targeted peptides. In this report,  
76 we describe a mass spectrometric (MS) pipeline and spectral resource to support data-  
77 independent acquisition (DIA) and parallel reaction monitoring (PRM) based biomarker  
78 studies. To build the spectral resource we integrated common open-source MS  
79 computational tools to assemble an open source computational workflow based on Docker.  
80 It was then applied to generate a comprehensive DIA pan-human library (DPHL) from 1,096  
81 data dependent acquisition (DDA) MS raw files, and it comprises 242,476 unique peptide  
82 sequences from 14,782 protein groups and 10,943 SwissProt-annotated proteins expressed  
83 in 16 types of cancer samples. In particular, tissue specimens from patients with prostate  
84 cancer, cervical cancer, colorectal cancer, hepatocellular carcinoma, gastric cancer, lung  
85 adenocarcinoma, squamous cell lung carcinoma, diseased thyroid, glioblastoma multiforme,  
86 sarcoma and diffuse large B-cell lymphoma (DLBCL), as well as plasma samples from a  
87 range of hematologic malignancies were collected from multiple clinics in China, the  
88 Netherlands and Singapore and included in the resource. This extensive spectral resource  
89 was then applied to a prostate cancer cohort of 17 patients, consisting of 8 patients with  
90 prostate cancer (PCa) and 9 with benign prostate hyperplasia (BPH), respectively. Data  
91 analysis of DIA data from these samples identified differential expressions of FASN, TPP1  
92 and SPON2 in prostate tumors. Thereafter, PRM validation was applied to a larger PCa  
93 cohort of 57 patients and the differential expressions of FASN, TPP1 and SPON2 in prostate  
94 tumors were validated. As a second application, the DPHL spectral resource was applied to  
95 a patient cohort consisting of samples from 19 DLBCL patients and 18 healthy individuals.  
96 Differential expressions of CRP, CD44 and SAA1 between DLBCL cases and healthy  
97 controls were detected by DIA-MS and confirmed by PRM. These data demonstrate that the  
98 DPHL supported that DIA-PRM MS pipeline enables robust protein biomarker discoveries.

99

100 **Keywords:** Data-independent acquisition; parallel reaction monitoring; spectral library;  
101 prostate cancer; diffuse large B cell lymphoma

102

103

## 104 INTRODUCTION

105 The recent development of high throughput genomic sequencing techniques, as well  
106 as methods for the global expression analysis of biomolecules has enabled identification of a  
107 number of oncological biomarkers from clinical samples, and advanced the field of cancer  
108 precision medicine [1-4]. Novel diagnostic/prognostic protein markers for colorectal [5, 6],  
109 breast [7], ovarian [8] and gastric tumors [9] have been identified through shotgun  
110 proteomics [10], and plasma proteomes were reported for 1500 obese patients [11].  
111 Sequential window acquisition of all theoretical fragment ion spectra mass spectrometry  
112 (SWATH-MS) is a data independent acquisition technique that combines the multiplexing  
113 ability of shotgun proteomics with the high-precision data analysis of selected reaction  
114 monitoring (SRM), and can quantify proteomes using single-shot MS/MS analysis [12, 13].  
115 The SWATH/DIA data sets are analyzed through spectral libraries using software tools like  
116 OpenSWATH [14, 15], DIA-Umpire [16], Group-DIA [17], Skyline [18], Spectronaut [19]. Most  
117 of these tools generate comparable results [15] and requires *a priori* spectral libraries. A pan-  
118 human spectral library (PHL) that was designed to aid in SWATH data processing has been  
119 developed to analyze SWATH maps generated by TripleTOF MS [20] by using open-source  
120 computational programs [1, 14], then the error rates of peptide and protein identification in  
121 large-scale DIA analyses has been statistically controlled [21]. The development of these  
122 tools has extended the application of SWATH-MS to diverse clinical samples including  
123 plasma [22], and the prostate [23] and liver [24] cancer tissues.

124 Despite these advances, the implementation of DIA-MS on widely used Orbitrap  
125 instruments is currently limited due to the lack of non-commercial tools to build spectral  
126 libraries. Theoretically one could build a spectral library based on the established protocol for  
127 TripleTOF data [1], however in practice an optimal and robust pipeline for Orbitrap data is  
128 missing, as we have implemented in this work. Further, it has been demonstrated that the  
129 library from TripleTOF led to fewer protein identifications than that from Orbitrap [25].  
130 Moreover, there is no bioinformatics pipeline to couple DIA-MS and PRM-MS for validation,  
131 and a comprehensive human spectral library resource for Orbitrap data is yet to be  
132 established. Spectronaut has been developed to support the generation of DIA spectral  
133 libraries and analysis of DIA data sets against these libraries [19], however, it is only  
134 commercially available. Parallel computing is only available for OpenSWATH software tools  
135 till now. To extend the application of large-scale DIA-MS on Orbitrap instruments, an open-  
136 source workflow is in great need to build a pan-human spectral library for DIA files generated  
137 for cancer biomarker discovery. Further, the open-source workflow and the spectral library  
138 are essential to validate the candidate protein biomarkers by PRM that is a more recently  
139 developed technique with higher sensitivity and specificity than SWATH/ DIA, albeit with  
140 limited throughput [26].

141 Here, we developed an open-source computational pipeline to build spectral libraries  
142 from Orbitrap spectral data, and generated a comprehensive DIA Pan-Human Library (DPHL)  
143 from 16 different human cancer types. In addition, we have also provided a Docker resource  
144 to integrate this pipeline to the data-dependent acquisition (DDA) spectral scans, which  
145 allows an easy and automatic expansion of the library by incorporating more MS data  
146 generated from ongoing studies. Finally, to validate its applicability in DIA and PRM, we  
147 applied the DPHL to identify differentially expressed proteins in the samples from a prostate  
148 cancer and a DLBCL cohort.

149

## 150 RESULTS AND DISCUSSION

### 151 Shotgun proteomics data of tumor tissues and plasma samples

152 To build a DIA spectral library for Orbitrap data which can also be used for PRM  
153 assay generation, we obtained shotgun proteomics data from two laboratories in China and  
154 the Netherlands that use Q Exactive HF mass spectrometers and consistent experimental

155 conditions (see Materials and Methods section). A total of 1,096 raw MS data files were  
156 collected from a range of samples that included tissue biopsies from prostate cancer,  
157 cervical cancer, colorectal cancer, hepatocellular carcinoma, gastric cancer, lung  
158 adenocarcinoma, squamous cell lung carcinoma, thyroid diseases, glioblastoma multiforme,  
159 sarcoma and DLBCL. Further, blood plasma samples from acute myelocytic leukemia (AML),  
160 acute lymphoblastic leukemia (ALL), chronic myelogenous leukemia (CML),  
161 multiple myeloma (MM), myelodysplastic syndrome (MDS) and DLBCL patients, and the  
162 human chronic myelogenous leukemia cell line K562 were also analyzed and the data were  
163 included in the library. The sample types and their DDA files are summarized in Figure 1A  
164 and Supplementary Table S1A. Comparison of DDA files acquired from the Guo lab and the  
165 Jimenez lab is provided in Supplementary Note 1.

## 166 **Open-source computational pipeline for building DIA/PRM spectral library**

167 The conventional OpenMS and OpenSWATH pipeline [14] requires sophisticated  
168 installation which relies on multiple existing software packages. A Docker image largely  
169 facilitate the installation process. We developed an open-source Docker image with all the  
170 pre-installed pipelines and its dependent packages to democratize the generation of  
171 DIA/PRM spectral libraries. The workflow of this computational pipeline is shown in Figure  
172 1B. Briefly, the DDA files were first centroided and converted to mzXML using MSconvert  
173 from ProteoWizard [27], and pFind [28] was used to identify the relevant peptides and  
174 proteins in the protein database. The shotgun data from each tissue type was processed  
175 separately. We wrote two scripts – pFindextract.R and addRT.py – to extract the retention  
176 time (RT), peptide sequence, charge state, protein name and identification score for each  
177 peptide precursor. Spectrast version 5.0 [29] was used to generate consensus spectra of  
178 peptides for each tissue type to build the library, spectrast2spectrast\_irt.py [30] was used for  
179 RT calibration, and spectrast2tsv.py [14] for selecting the top six fragments for each peptide  
180 precursor. Decoy assays were generated using OpenSwathDecoyGenerator from  
181 OpenSWATH software [14].

182 For both, library building and SWATH/DIA analysis, the peptide samples were usually  
183 spiked with a synthetic iRT peptides mixture (SiRT) [31] to calibrate the retention time, and  
184 the SWATH library building workflow [1] was also applied to these samples. For the samples  
185 without SiRT spike-in, we employed tools to identify the conserved high-abundance peptides  
186 with common internal retention time (CiRT) [30]. The peptides of each tissue type had to  
187 fulfill the following criteria to be considered as CiRTs peptides: (1) proteotypic, (2) amino  
188 acid sequences with no modification, (3) signal intensities above the 3rd quartile of all  
189 quantified peptide precursors, (4) charge +2 or +3, and (5) uniformly distributed retention  
190 time across the entire LC gradient. Following these criteria, we implemented codes dividing  
191 the LC gradient window into 20 bins, and selecting one peptide for each bin. Thereby we  
192 selected 20 CiRT peptides for each tissue type. The CiRT of the different tissue types are  
193 shown in Supplementary Table S2. The TraML format of the CiRT peptides are provided in  
194 Supplementary File S1. The CiRT peptides can either be used synergistically with  
195 exogenous SiRT standards or as an alternative RT standard in the respective samples. We  
196 expect these CiRT peptides to be of wide use in future DIA experiments for these clinical  
197 tissue samples.

198 Since the current version of the pFind software does not support the quantification of  
199 identified peptides, CiRT peptides were selected from a representative DDA data set which  
200 was analyzed by MaxQuant (version 1.6.2) [32]. We then wrote the generate\_CiRT script to  
201 analyze the peptides.txt files from the MaxQuant search results, and generated the tissue-  
202 specific CiRTs. The latter was used to replace SiRTs in the command  
203 spectrast2spectrast\_irt.py [30]. For RT calibration, we used the spectrast2spectrast\_irt.py  
204 converter script on the SiRT or CiRT peptides. Similarly, spectrast was then used to build a  
205 consensus library, and spectrast2tsv.py and OpenSwathDecoyGenerator [14] to append



206 decoy assays into the library. The computational pipeline is illustrated and explained in more  
207 detail in Supplementary Note 2.

## 208 **Build and characterization of the DPHL library**

209 We first characterized the content of the newly-generated DPHL library in terms of  
210 the peptide and proteins identifications and compared it to the PHL library for SWATH [20].  
211 The DPHL library includes 359,627 transition groups (peptide precursors), 242,476 unique  
212 peptide sequences, 14,782 protein groups, and 10,943 proteotypic SwissProt proteins  
213 (Figure 2A). And DPHL contains 2842 protein groups and 1173 proteotypic SwissProt  
214 proteins identified from a single peptide. The two libraries share 9,241 unique proteins,  
215 which represent 84.4% of the DPHL and 89.5% of the PHL contents, respectively (Figure  
216 2A). The DPHL library includes more transition groups, unique peptide sequences and  
217 protein groups compared to the PHL SWATH library (Figure 2A). Proteins in DPHL are of  
218 higher sequence coverage (Supplementary Figure S1), enabling better measurement of  
219 specific domains of proteins.

220 We then counted the number of peptide precursors, unique peptide sequences, and  
221 protein groups for each of the 16 sample types (Figure 2B) and found that the solid tissues,  
222 but not the plasma samples, shared a large number of proteins. The leukemia samples had  
223 the highest number of peptides and proteins due to the higher number of DDA files ( $n = 160$ )  
224 available. The plasma samples had, as expected, the lowest number of peptides and  
225 proteins due to the dominance of high abundance proteins. Cumulative plots of peptides and  
226 proteins of the 16 types of cancer (tissue, plasma and cell line) are shown in Supplementary  
227 Figure S1a and Supplementary Figure S1b. There was a significant increase in the number  
228 of transition groups when DDA data was added from different tissue types (Supplementary  
229 Figure S2A), while the increase in the number of proteins was relatively less (Supplementary  
230 Figure S2B). We further investigated the increase of peptide precursors and proteins in two  
231 well sampled tissue type and found that this DPHL library is not yet complete, probably due  
232 to semi-tryptic peptides and missed cleavages due to biological heterogeneity  
233 (Supplementary Figure S2C, S2D), awaiting for future expansion with more spectral data.

234 Next, we analyzed the biological content of the DPHL library. To investigate the  
235 biological coverage of this DPHL, we did GO (Gene Ontology) enrichment analysis using R  
236 package clusterProfiler, as shown in Supplementary Figure S3, demonstrating that our  
237 DPHL covers proteins with diverse molecular functions.

238 The kinases were next characterized using KinMap [33], an online tool that links the  
239 biochemical, structural and disease association data of individual kinases to the human  
240 kinome tree. A total of 340 kinases (63.2% out of 538 known protein kinases) identified in  
241 DPHL were plotted in the KinMap tree. As shown in Supplementary Figure S4, DPHL covers  
242 all the major branches of the kinome tree. More characteristics of the kinases in DPHL are  
243 show in Supplementary Figure S5. Transcription factors (TFs) are special proteins that bind  
244 target DNA sequence to regulate and control gene transcription. TFs are extremely  
245 important to disease genesis, development and disease progression. We matched our DPHL  
246 library to the 1639 TFs from the Human Transcription Factors database [34], and found that  
247 the DPHL covers 33.0% of the known TFs (Supplementary Figure S6).

248

## 249 **Application of the DPHL library to prostate cancer tissue samples**

250 Next we apply the DPHL library to analyze representative clinical sample cohorts.  
251 First, we procured prostate tissue samples from 17 patients, consisting of 8 prostate cancers  
252 (PCa) and 9 cases of benign prostate hyperplasia (BPH) (Supplementary Table S3), and  
253 analyzed them by QE-HF MS operated in DIA mode. The peptides were separated on a 60  
254 min LC gradient. Two additional technical replicates were randomly selected for each patient  
255 group. Twenty-four DIA files were thus acquired, 4,785 protein groups, 4,391 SwissProt

256 proteins and 3,723 proteotypic proteins were identified from 37,581 peptide precursors that  
257 were searched against the DPHL library using the CiRT strategy (Figure 3A). Figure 3B  
258 shows that proteins were identified at a high degree of reproducibility across the samples  
259 tested. The SiRT and CiRT strategies achieved comparable performance (Figure 3C). T-  
260 SNE[35] plots show that PCa and BPH were clearly distinguished by the data analyzed by  
261 both, the CiRT and SiRT strategies (Figure 3D).

262 Of the 3,723 identified proteins, 1,555 (1,451 up, 104 down) showed significant  
263 differential abundance (Benjamini-Hochberg (BH) adjusted p-values <0.05 and intensity fold-  
264 change higher than 2 or lower than 0.5) using CiRT compare to 2,109 (1,954 up and 155  
265 down) proteins using SiRT (see Supplementary Table S3E-S3F). And we used Random  
266 forest to select the top 400 most important proteins contributing to the separation of benign  
267 and malignant samples, followed by metasplice [36] and DAVID [37] for pathway enrichment  
268 analysis. We then identified four representative biomarker candidates based on their  
269 molecular functions, including fatty acid synthase (P49327, FASN), tripeptidyl-peptidase 1  
270 (O14773, TPP1), and spondin-2 (Q9BUD6, SPON2). FASN, TPP1 and SPON2 were  
271 significantly regulated. FASN overexpression has been reported to be associated with poor  
272 prognosis in prostate cancers [38]. TPP1 regulates single-stranded telomere DNA binding  
273 and telomere recruitment, thus maintaining telomere stability [39-41]. Since genomic  
274 instability drives prostate cancer progression from androgen-dependence to castration  
275 resistance [42], TPP1 is a promising biomarker [43]. SPON2 is a cell adhesion protein which  
276 plays a role in tumor progression and metastasis, and was reported as a serum biomarker  
277 [44-46]. The boxplots and ROC curves of these proteins are shown in Figure 3E.

278

### 279 **Application to diffuse large B cell lymphoma (DLBCL) plasma samples**

280 Plasma is widely used in clinical diagnosis for its convenient access. Here we applied  
281 the DIA mass spectrometry and the DPHL resource to analyze the plasma samples from  
282 DLBCL patients. The plasma samples were procured from 19 DLBCL patients and 18  
283 healthy individuals (Supplementary Table S5). Each unfractionated and un-depleted plasma  
284 sample was trypsinized and the resulting peptides were separated on a 20 min LC gradient  
285 and measured by DIA-MS on a QE-HF instrument. A total of 7,333 peptide precursors were  
286 identified by searching the data against the DPHL plasma subset library using the CiRT  
287 strategy with high technical reproducibility ( $R^2 = 0.96$ , Figure 4A). We identified 507 protein  
288 groups and 304 proteotypic proteins. More detailed information per sample was show in  
289 Supplementary Figure S7. The DLBCL samples were clearly distinguished from the healthy  
290 control samples by t-SNE analysis of the quantified proteome (Figure 4B), indicating that our  
291 workflow can distinguish DLBCL patients from healthy individuals based on their plasma  
292 proteomes.

293 After comparing the DLBCL/healthy (or normal) plasma proteomes using *t*-test with  
294 same criteria as the prostate cohort, we identified 24 differential proteins (18 up and 6 down,  
295 Supplementary Table S5D), from which we choose three biomarker candidates (Figure 4C)  
296 which were closely associated to DLBCL among these 24 proteins based on literature,  
297 including C-reactive protein (CRP), CD44 and serum amyloid A1 (SAA-1). CRP is an  
298 indicator of the inflammatory response and has prognostic value in various solid tumors,  
299 including DLBCL [47]. The hyaluronic acid receptor CD44 and SAA-1 have been previously  
300 identified as prognostic biomarkers for DLBCL [48] [49]. The boxplots and ROC curves of  
301 these proteins are shown in Figure 4D. Taken together, our workflow can identify potential  
302 prognostic biomarkers of DLBCL.

303

### 304 **DPHL-assisted protein validation using PRM**

305 We then validated the candidate biomarkers using PRM, a highly specific and  
306 sensitive analytical method that can systematically and precisely quantify well-defined sets  
307 of peptides in complex samples. The DPHL spectra were used to develop PRM assays  
308 using Skyline [18].

309 *Validation in prostate samples.* To validate the DIA results of the prostate samples, we  
310 included another independent cohort, thereby increasing the total number of samples to 73  
311 from 57 patients (Supplementary Table S4). The two best flying peptides were selected for  
312 each protein to measure the abundance of FASN, TPP1 and SPON2 (Figure 5). As shown in  
313 Figure 3E and Figure 5, the PRM well confirmed the DIA results. As a representative  
314 example, the peak areas of protein TPP1 (O14773) across all samples are shown in  
315 Supplementary Figure S8.

316 *Validation in plasma samples.* The putative DLBCL biomarkers P02741 (CRP) and P0DJ18  
317 (SAA1) that were identified from the DIA dataset were selected for PRM validation. Skyline  
318 was used to visualize characteristic peptides for CRP and SAA1. One of the best flying  
319 peptides were selected for CRP and SAA1 to measure the abundance of each protein,  
320 respectively (Supplementary Figure S9). The peak groups of the fragment ions were  
321 manually curated. As shown in Figure S9, both proteins are highly upregulated in DLBCL  
322 patients compared to healthy individuals, confirming the results obtained by DIA (Figure 4D).  
323 As an example, the peak areas of peptide ESDTSYVSLK (m/z 564.77) of CRP (P02741)  
324 across all samples are shown in Supplementary Figures S10.

325

## 326 CONCLUSION

327 In this study, we have developed an open-source platform consisting of a  
328 computational pipeline to generate spectral libraries for DIA and PRM analyses on Orbitrap  
329 instruments. We also reported a reference spectral library, which can be used to identify and  
330 validate protein biomarkers in clinical samples using DIA-MS. With over 370,000 peptide  
331 precursors and more than 10,000 proteotypic SwissProt proteins, the DPHL library is the  
332 most comprehensive SWATH/DIA library built to date, and allows convenient partitioning into  
333 tissue- and disease-specific sub-libraries. Additionally, the DPHL is specifically designed for  
334 protein measurement of clinical samples including tissues and plasma, while the PHL is  
335 mainly for cell lines and synthetic peptides. Using this approach, we were able to analyze  
336 proteomes of 20 human tissue and 40 plasma proteomes per MS instrument per day. We  
337 will continue to generate additional DDA files from more types of human tumors with the  
338 ambition of incorporating internal and external data to create a comprehensive resource  
339 reflecting tumor heterogeneity that enables biomarker discovery as a mission of the Human  
340 Proteome Organization Cancer HPP project [50]. By appending these results to the DPHL,  
341 we can increase the human proteome coverage. The DPHL is not only applicable to open-  
342 source SWATH/DIA analysis tools like OpenSWATH, but also to other tools including  
343 Spectronaut and Skyline.

344

## 345 MATERIALS AND METHODS

346 All chemicals were from Sigma unless otherwise stated. All HPLC/MS grade reagents for  
347 mass spectrometry were from Thermo Fisher.

### 348 Clinical samples

349 Formalin-fixed paraffin-embedded (FFPE), fresh or fresh frozen (FF) tissue biopsies  
350 from prostate cancer, cervical cancer, colorectal cancer, hepatocellular carcinoma, gastric  
351 cancer, lung adenocarcinoma, squamous cell lung carcinoma, thyroid diseases,  
352 glioblastoma multiforme, sarcoma, and DLBCL were analyzed in this study. Human plasma  
353 samples from a range of types of leukemia, lymphoma, plasma cell disorders, anemia, and

354 DLBCL were also included. The human chronic myelocytic leukemia cell line, K562, was  
355 present in the dataset. The details about the samples are described in Supplementary Table  
356 S1a. Ethics approvals for this study were obtained from the Ethics Committee or Institutional  
357 Review Board of each participating institution.

#### 358 *Chinese cancer tissue cohorts*

359 Prostate cancer FFPE samples were acquired from the Second Affiliated Hospital of  
360 Zhejiang University School of Medicine. The first cohort included 3 PCa patients and 3  
361 patients with BPH was used for DPHL library building. The second cohort containing 8 PCa  
362 patients and 9 BPH patients was selected for DIA-MS proteotyping. For each patient, four  
363 tissue biopsies (punch  $1 \times 1 \times 5 \text{ mm}^3$ ) from the same region were procured for the subsequent  
364 PCT-SWATH/DIA workflow for targeted quantitative proteomics profiling. Besides the  
365 second cohort, a third cohort included 53 patients (16 BPH and 57 PCa) was also included  
366 for PRM validation. PRM and DIA analyses were performed in technical duplicate.  
367 Information about samples of patient used for DIA and PRM measurements are described in  
368 Supplementary Table S3 and Supplementary Table S4.

369 The colorectal tissue cohort (CRC) was acquired from histologically confirmed tumors  
370 at the First Affiliated Hospital of Zhejiang University School of Medicine and the Second  
371 Affiliated Hospital of Zhejiang University School of Medicine. Among the 15 donors, 8  
372 patients were diagnosed with colorectal adenocarcinoma, 1 patient with mucinous  
373 adenocarcinoma, 3 patients with adenoma, 2 patients with polyps and 1 with benign tissue at  
374 the edge of colorectal tumors. FF tissue samples were snap frozen and stored in liquid  
375 nitrogen immediately after surgery and were transported to the proteomics lab within 24h.  
376 The colorectal tissue cohort of 15 donors consisted of FFPE and fresh frozen (FF) tissue  
377 samples. These samples ( $1.5 \times 1.5 \times 5 \text{ mm}^3$  in size) were punched from pathologically  
378 confirmed tissue area by Manual Tissue Arrayer MTA-1 (Beecher, US). FF tissue samples  
379 were snap frozen and stored in liquid nitrogen immediately after surgery and were  
380 transported to the proteomics lab within 24h.

381 The hepatocellular carcinoma (HCC) cohort and lung adenocarcinoma cohort were  
382 collected from Union hospital, Tongji Medical College, Huazhong University of Science and  
383 Technology. Sixty-six tissue samples (benign and tumor) from 33 HCC patients were  
384 collected within one hour after hepatectomy, then snap frozen and stored at  $-80^\circ\text{C}$ . Sixteen  
385 tissue samples (matched benign and tumor pairs) from 8 lung adenocarcinoma patients  
386 were collected within one hour after pneumonectomy, then snap frozen and stored at  $-80^\circ\text{C}$ .

387 The cervical cancer cohort was collected from Tongji Hospital, Tongji Medical  
388 College, Huazhong University of Science and Technology. Thirteen FFPE cancerous and  
389 benign tissues were obtained from patients with operable cervical cancer.

#### 390 *Chinese cancer plasma cohorts*

391 Pooled plasma for building the plasma library was created by mixing plasma (10ul for  
392 each patients) from 20 patients from Union Hospital, Tongji Medical College, Huazhong  
393 University of Science and Technology. Each of the 20 patients had one of the following  
394 hematologic malignancies: acute myelocytic leukemia (AML), acute lymphoblastic leukemia  
395 (ALL), chronic myelocytic leukemia (CML), multiple myeloma (MM), myelodysplastic  
396 syndrome (MDS) and diffuse large B cell lymphoma (DLBCL). The validation cohort  
397 consisted of two groups: 18 clinically healthy volunteers from the Second Affiliated Hospital,  
398 Zhejiang University School of Medicine; and 19 patients diagnosed with DLBCL from Union  
399 Hospital, Tongji Medical College.

#### 400 *Dutch cancer tissue cohorts*

401 The glioblastoma, DLBCL, AML, ALL, cervical, pancreatic and gastric cancer cohorts  
402 were collected at Amsterdam UMC/VU medical center, Amsterdam. mirVana acetone  
403 precipitations of 19 glioblastoma cancer tissues were pooled by EGFR status (10 wild-type



404 EGFR and 9 mutant (vIII) EGFR samples). Similarly, mirVana acetone precipitations of 27  
405 DLBCL lymphoma patients were pooled by origin (12 samples of neck origin and 17 of non-  
406 neck origin). For AML, 2 pools of 2 patient samples each were prepared. For ALL, 14  
407 individual primary ALL cell samples were used, 9 glucocorticoid (GC) resistant and 5 GC  
408 sensitive. Cervical cancer tissue lysates of 16 patients were prepared and pooled by subtype  
409 (9 SCC and 7 AdCa samples). For pancreatic cancer, individual tissue lysates of 20 patients  
410 were used. For gastric cancer, tissues in the form of FFPE material of 10 patients were  
411 pooled by tumor percentage (7 with over 50% and 3 with 50% or lower).

412 The lung cancer cohort was acquired from Amsterdam UMC/VU medical center,  
413 Amsterdam and Antoni van Leeuwenhoek hospital/Netherlands Cancer Institute, Amsterdam.  
414 Tumor resection samples in the form of FFPE material were collected from 10 lung  
415 adenocarcinoma, 10 squamous cell lung carcinoma and 3 large cell lung carcinoma patients  
416 and pooled per subtype.

417 The soft tissue sarcoma cohort was acquired from Antoni van Leeuwenhoek  
418 hospital/Netherlands Cancer Institute, Amsterdam. 7 sarcoma and 9 sarcoma metastasis  
419 tissues were pooled, respectively.

420 Prostate and bladder cancer cohorts were acquired from Amsterdam UMC/VU  
421 medical center, Amsterdam and Erasmus University Medical Center, Rotterdam. 18 prostate  
422 cancer tissues and 9 control tissues in the form of FFPE material were pooled, respectively.  
423 In addition, 22 fresh frozen prostate cancer tissues were combined to 2 pools of 11 samples  
424 each. 10 bladder cancer tissues in the form of FFPE material were pooled in 2 pools of 5  
425 samples each.

426 The CRC and triple-negative breast cancer (TNBC) cohorts were collected at  
427 Erasmus University Medical Center, Rotterdam. For CRC, 2 pools were made per CMS  
428 subtype (CMS1, 2, 3 and 4), whereby each pool contained tissue lysates of 5 patients. For  
429 TNBC, 2 pools of 23 and 24 patient tissues each were used.

#### 430 *Singapore thyroid cancer cohort*

431 The thyroid tissue cohort was kindly provided by National Cancer Centre, Singapore.  
432 105 FFPE thyroid tissue punches from 63 patients were included in this study. The cohort is  
433 composed of 5 patients with normal thyroid, 28 with multinodular goiter, 10 with follicular  
434 thyroid adenoma, 5 with follicular thyroid carcinoma and 15 with papillary thyroid carcinoma.

435

#### 436 **Pre-treatment and de-crosslinking of FFPE tissue samples**

437 About 1 mg of FFPE tissue was first dewaxed three times by heptane, then  
438 rehydrated in a gradient of 100%, 90%, 75% ethanol. The partly rehydrated samples were  
439 then transferred into microtubes (PBI, MA, USA) and soaked in 0.1% formic acid (FA) for  
440 complete rehydration and acidic hydrolysis for 30 min, under shaking at 600 rpm, 30°C. The  
441 thus treated FFPE samples were washed using 0.1 M Tris-HCl (pH 10.0) by gentle shaking  
442 and spinning down. The supernatant was discarded. 15 µL of 0.1 M Tris-HCl (pH 10.0) was  
443 added to cover tissues and the suspension was boiled at 95 °C for 30 min for basic  
444 hydrolysis under gentle shaking. Subsequently the sample was fast cooled to 4°C, topped  
445 with 25 µL of lysis buffer containing 6M urea and 2M thiourea, 0.1mM NH<sub>4</sub>HCO<sub>3</sub> (pH 8.5),  
446 and subjected to PCT-assisted tissue lysis and digestion.

447

#### 448 **PCT-assisted tissue lysis and digestion**

449 About 1mg of de-crosslinked FFPE tissue or pre-washed FF tissue was mixed with  
450 35µL lysis buffer containing 6M urea and 2M thiourea, 0.1mM NH<sub>4</sub>HCO<sub>3</sub> (pH 8.5) in  
451 microtubes and capped with micropestles (PBI, MA, USA). Alternatively, if the proteins were

452 extracted for later 1D SDS-page separation, 1% SDS in Milli-Q water was used instead of  
453 urea/thiourea lysis buffer. Tissues were lysed in a barocycler NEP2320-45k (Pressure  
454 BioSciences Inc.) at the PCT scheme of 30s high pressure at 45kpsi plus 10s ambient  
455 pressure, oscillating for 90 cycles at 30°C. Extracted proteins were reduced and alkylated by  
456 incubating with 10mM Tris(2-carboxyethyl) phosphine (TCEP) and 20mM iodoacetamide  
457 (IAA) at 25 °C for 30 min, in darkness, by gently vortexing at 800 rpm in a thermomixer.  
458 Afterwards, proteins were digested by Lys-C (Hualishi Beijing; enzyme-to-substrate ratio,  
459 1:40) using the PCT scheme of 50 s high pressure at 20 kpsi plus 10 s ambient pressure,  
460 oscillating for 45 cycles at 30°C. This was followed by a tryptic digestion step followed  
461 (Hualishi Beijing; enzyme-to-substrate ratio, 1:50) using the PCT scheme of 50 s high  
462 pressure at 20kpsi plus 10s ambient pressure, oscillating for 90 cycles at 30°C. Finally, 15  
463  $\mu$ L of 10% trifluoroacetic acid (TFA) was added to each tryptic digest to quench the  
464 enzymatic reaction (final concentration of 1% TFA). Peptides were purified by BioPureSPN  
465 Midi C18 columns (The Nest Group Inc., Southborough, MA) according to the  
466 manufacturer's protocol. Peptide eluates were then dried under vacuum (LABCONCO  
467 CentriVap, Kansas, MO). Dry peptides were dissolved in 20  $\mu$ L of water containing 0.1% FA  
468 and 2% ACN (acetonitrile) (all MS grade). Peptide concentration was measured using  
469 ScanDrop<sup>2</sup> (AnalytikJena, Beijing, China) at A280.

470

#### 471 **1D SDS-PAGE separation at protein level for building DDA library**

472 SDS-PAGE separation and peptide preparation in Jimenez lab, the Netherlands:  
473 Tissues were lysed in 1x reducing NuPAGE LDS sample buffer (Invitrogen, Carlsbad, CA),  
474 sonicated in a Branson cup-type digital sonifier, centrifuged, and heated for 5 minutes at  
475 95°C. Protein lysates were separated on precast 4-12% gradient gels using the NuPAGE  
476 SDS-PAGE system (Invitrogen, Carlsbad, CA). Following electrophoresis, gels were fixed in  
477 50% ethanol/3% phosphoric acid solution and stained with Coomassie R-250. Subsequently,  
478 gel lanes were cut into 10 bands and each band was cut into ~1 mm<sup>3</sup> cubes. The gel cubes  
479 from each band were transferred into a well of a 96-well filter plate (Eppendorf, Hamburg,  
480 Germany) and were washed in 50 mM NH<sub>4</sub>HCO<sub>3</sub> and 2x 50 mM NH<sub>4</sub>HCO<sub>3</sub>/50% ACN.  
481 Subsequently, gel cubes were reduced for 60 min in 10 mM dithiothreitol (DTT) at 56°C and  
482 alkylated for 45 min in 50 mM IAA (both Sigma, St Louis, MO) in the dark, at room  
483 temperature. After washing in 50 mM NH<sub>4</sub>HCO<sub>3</sub> and 2x 50 mM NH<sub>4</sub>HCO<sub>3</sub>/50% ACN, the gel  
484 cubes were dried for 10 min in a vacuum centrifuge at 60°C and subsequently incubated in  
485 50  $\mu$ L 6.25 ng/ $\mu$ L sequence-grade trypsin (Promega, Madison, WI) in 50 mM NH<sub>4</sub>HCO<sub>3</sub> at  
486 room temperature overnight. Peptides from each gel band were extracted once using 150  $\mu$ L  
487 1% FA, and twice using 150  $\mu$ L 5% FA/50%ACN and were pooled in a 96-deep-well plate  
488 and centrifuged to dryness at 60°C in a vacuum centrifuge and stored at -20°C. Dried  
489 peptide extracts were dissolved in 25 $\mu$ L loading solvent (0.5% TFA in 4% ACN) containing  
490 2.5 injection equivalent (IE) iRT retention time peptide standard (Biognosys, Schlieren, CH).  
491 5  $\mu$ L of peptide extract containing 0.5 IE iRT peptides was injected into the nanoLC system.

492 SDS-PAGE separation and peptide preparation in Guo lab, China: About 200-300  $\mu$ g  
493 of protein was mixed with 3x SDS sample loading buffer (GenScript Biotech, China)  
494 supplemented with 150 mM DTT, and the mixture was boiled at 95°C for 5 min. 1D gel  
495 electrophoresis was performed using 4-12% gradient SDS-PAGE after which the gel was  
496 removed, washed first with distilled water and then with the fixing buffer (50% (v/v) ethanol in  
497 water with 5% (v/v) acetic acid) at room temperature for 15 min with gentle agitation to  
498 remove excessive SDS. The fixed and washed gel was stained in Coomassie blue for  
499 around 1 h with gentle agitation, and then de-stained until the background was clear and  
500 protein bands were visible. The gel was rehydrated in distilled water at room temperature for  
501 30 min with gentle agitation. Ten protein bands to cover each lane were cut out and further  
502 cut into ca 1  $\times$  1 mm<sup>2</sup> pieces, followed by reduction with 10 mM TCEP in 25mM NH<sub>4</sub>HCO<sub>3</sub> at  
503 25°C for 1 h, alkylation with 55 mM IAA in 25 mM NH<sub>4</sub>HCO<sub>3</sub> solution at 25°C in the dark for

504 30 min, and sequential digestion with trypsin at a concentration of 12.5 ng/mL at 37°C  
505 overnight (1<sup>st</sup> digestion for 4hrs and 2<sup>nd</sup> digestion for 12hrs). Tryptic-digested peptides from  
506 gel pieces were extracted three times using 50% ACN/5% FA and dried under vacuum. Dry  
507 peptides were purified by Pierce C18 Spin Tips (Thermo Fisher, USA).

#### 508 **Preparation and fractionation of plasma protein samples**

509 Venous blood of each patient was collected in EDTA and anticoagulation proceeded  
510 for 9 hours. Plasma samples obtained by centrifugation were transferred to a new set of 1.5  
511 mL Eppendorf tubes and stored at 4°C. Samples were cold-transported from the hospital to  
512 the proteomics lab within 36 h at 4°C. Samples were centrifuged again at 300g for 5min at  
513 4°C to remove cells and the supernatants were further centrifuged at 2500g for 15min at 4°C  
514 to remove cell debris and platelets. The final supernatants were stored at -80°C for further  
515 protein extraction and in solution digestion.

516 To remove very high abundant plasma proteins in this study, whole plasma peptides  
517 were further extensively fractionated by several methods such as SDS-PAGE separation,  
518 antibody-depletion of high abundant proteins and exosome isolation.

519 For SDS-PAGE fractionation, the entire gel was cut into 12 thin gel rows, of which  
520 four rows with heavily stained protein bands (3 adjacent bands between 45-75 kD, and a  
521 band between 25 and 35 kD) were picked out for depletion of high abundant proteins. Each  
522 of the other 8 rows was subjected to in-gel digestion as described above. We also used High  
523 Select Top 14 Abundant Protein Depletion Resin spin columns (Thermo Scientific, A36370)  
524 to deplete high abundance proteins in plasma samples according to the manufacturer's  
525 instructions; and further fractionated and digested the depleted plasma proteins by 1D SDS-  
526 PAGE.

527 To obtain the enriched exosome fraction, an aliquot of 200 µL plasma was taken  
528 after centrifuging venous blood for 10 min at 3000 g, 4°C. The exosome pellet was collected  
529 after ultracentrifugation at 160,000g, 4°C for 12h and resuspended in cold phosphate-  
530 buffered saline for washing. Resuspended exosomes were further centrifuged at 100,000g,  
531 4°C for 70 min. The pellet was collected and redissolved in 150 µL of 2% SDS. The  
532 exosome fraction in 2% SDS was subjected to PCT-assisted sample lysis, undergoing 60  
533 cycles at 20°C, with 45 k p.s.i. for 50s and atmosphere pressure for 10 s. After lysis, the  
534 exosome protein mixture was precipitated with 80% cold acetone at -20°C for 3h and the  
535 suspension was centrifuged at 12,500 g, 4°C for 15 min to collect the protein pellet. The  
536 protein pellet was redissolved with 200 µL of 1% SDS, followed by SDS-PAGE separation  
537 and subsequent in-gel digestion. Each exosome protein sample was cut into three fractions  
538 and digested as described above.

539

#### 540 **Strong cation-exchange (SCX) fractionation at peptide level for building DDA library**

541 The SCX solid phase extraction (SPE) cartridge (Thermo Scientific, # 60108-421)  
542 was conditioned first according to the manufacturer's protocol. For SCX fractionation, about  
543 1mg peptides were dissolved in 1 mL of 5 mM KH<sub>2</sub>PO<sub>4</sub>/25%ACN (pH = 3.0), then the  
544 peptide solution was loaded onto the well-conditioned SCX SPE cartridge. The cartridge was  
545 then rinsed with 5mM KH<sub>2</sub>PO<sub>4</sub>/25%ACN (pH = 3.0). Finally, six peptide fractions were  
546 collected by eluting the cartridge with 1.5 mL increments of increasing KCl concentration in  
547 5mM KH<sub>2</sub>PO<sub>4</sub>/25%ACN, i.e. 50 mM, 100 mM, 150 mM, 250 mM, 350 mM, and 500 mM.  
548 Each fraction was collected and vacuumed to dryness. Dry peptides and precipitated salts  
549 were redissolved in 200µL of 0.1% TFA and subjected to further C18 desalting by  
550 BioPureSPN Midi SPE (Nest Group, Cat # HEM S18V).

551

#### 552 **DDA data acquisition in Jimenez lab**

553 547 DDA raw data files were generated at Jimenez lab. All peptides were prepared  
554 via SDS-PAGE fractionation and in-gel digestion. Peptides were separated by an Ultimate  
555 3000 nanoLC-MS/MS system (Dionex LC-Packings, Amsterdam, The Netherlands)  
556 equipped with a 40 cm × 75 μm ID fused silica column custom packed with 1.9 μm 120Å  
557 ReproSil Pur C18 aqua (Dr Maisch GMBH, Ammerbuch-Entringen, Germany). After injection,  
558 peptides were trapped at 10μL/min on a 10mm × 100 μm ID trap column packed with 5 μm  
559 120Å ReproSil Pur C18 aqua in 0.1% formic acid. Peptides were separated at 300 nL/min in  
560 a 10–40% linear gradient (buffer A: 0.1% formic acid (Fischer Scientific), buffer B: 80% ACN,  
561 0.1% formic acid) in 90 min (130 min inject-to-inject). Eluting peptides were ionized at a  
562 potential of +2 kV into a Q Exactive mass spectrometer (Thermo Fisher, Bremen, Germany).  
563 Intact masses were measured at resolution 70,000 (at m/z 200) in the orbitrap using an AGC  
564 target value of 3E6 charges and an S-lens setting of 60. The top 10 peptide signals (charge-  
565 states 2+ and higher) were submitted to MS/MS in the HCD (higher-energy collision) cell  
566 (1.6 amu isolation width, 25% normalized collision energy). MS/MS spectra were acquired at  
567 resolution 17,500 (at m/z 200) in the orbitrap using an AGC target value of 1E6 charges, a  
568 max injection time (IT) of 80ms and an underfill ratio of 0.1%. Dynamic exclusion was  
569 applied with a repeat count of 1 and an exclusion time of 30 s.

570

#### 571 **DDA Data acquisition in Guo Lab**

572 549 DDA raw data files were generated at Guo lab. Biognosys-11 iRT peptides  
573 (Biognosys, Schlieren, CH) were spiked into peptide samples at the final concentration of  
574 10% prior to MS injection for RT calibration. Peptides were separated by Ultimate 3000  
575 nanoLC-MS/MS system (Dionex LC-Packings, USA) equipped with a 15 cm × 75μm ID  
576 fused silica column packed with 1.9μm 100Å C18. After injection, peptides were trapped at 6  
577 μL/min on a 20 mm × 75 μm ID trap column packed with 3 μm 100 Å C18 aqua in 0.1%  
578 formic acid. Peptides were separated along a 120min 3–25% linear LC gradient (buffer A:  
579 2% ACN, 0.1% formic acid (Fisher Scientific), buffer B: 98% ACN, 0.1% formic acid) at the  
580 flowrate of 300 nL/min (148 min inject-to-inject). Eluting peptides were ionized at a potential  
581 of +1.8 kV into a Q-Exactive HF mass spectrometer (Thermo Fisher, Bremen, Germany).  
582 Intact masses were measured at resolution 60,000 (at m/z 200) in the orbitrap using an AGC  
583 target value of 3E6 charges and a S-lens setting of 50. The top 20 peptide signals (charge-  
584 states 2+ and higher) were submitted to MS/MS in the HCD (higher-energy collision) cell  
585 (1.6 amu isolation width, 27% normalized collision energy). MS/MS spectra were acquired at  
586 resolution 30,000 (at m/z 200) in the orbitrap using an AGC target value of 1E5 charges, a  
587 max IT of 80ms and an underfill ratio of 0.1%. Dynamic exclusion was applied with a repeat  
588 count of 1 and an exclusion time of 30 s.

589

#### 590 **DIA data acquisition in Guo lab**

591 The LC configuration for DIA data acquisition is as the same as for DDA data  
592 acquisition with slight modifications. Biognosys-11 iRT peptides (Biognosys, Schlieren, CH)  
593 were spiked into peptide samples at the final concentration of 10% prior to MS injection for  
594 RT calibration. Peptides were separated at 300 nL/min in a 3–25% linear gradient (buffer A:  
595 2% CAN, 0.1% formic acid (Fischer Scientific), buffer B: 98% ACN, 0.1% formic acid) in 45  
596 min (68 min inject-to-inject). Eluting peptides were ionized at a potential of +1.8 kV into a Q-  
597 Exactive HF mass spectrometer (Thermo Fisher, Bremen, Germany). A full MS scan was  
598 acquired analyzing 390-1010 m/z at resolution 60,000 (at m/z 200) in the orbitrap using an  
599 AGC target value of 3E6 charges and maximum IT 80ms. After the MS scan, 24 MS/MS  
600 scans were acquired, each with a 30,000 resolution at m/z 200, AGC target 1E6 charges,  
601 normalized collision energy was 27%, with the default charge state set to 2, maximum IT set  
602 to auto. The cycle of 24 MS/MS scans (center of isolation window) with three kinds of wide  
603 isolation window are as follows (m/z): 410, 430, 450, 470, 490, 510, 530, 550, 570, 590, 610,



604 630, 650, 670, 690, 710, 730, 750, 770, 790, 820, 860, 910, 970. The entire cycle of MS and  
605 MS/MS scans acquisition took roughly 3s and was repeated throughout the LC/MS/MS  
606 analysis.

607

## 608 **DIA Data analysis using OpenSWATH and TRIC**

609 Briefly, DIA raw data files were converted in profile mode to mzXML using msconvert  
610 and analyzed using OpenSWATH (2.0.0) [14] as described [13]. Retention time extraction  
611 window was 600 seconds, and m/z extraction was performed with 0.03Da tolerance.  
612 Retention time was then calibrated using both SiRT and CiRT peptides. Peptide precursors  
613 that were identified by OpenSWATH and pypopphet with d\_score >0.01 were used as inputs  
614 for TRIC [51]. For each protein, the median MS2 intensity value of peptide precursor  
615 fragments which were detected to belong to the protein was used to represent the protein  
616 abundance.

617

## 618 **Terms for protein identifications**

619 In this paper, the term “protein group” indicates a group of proteins sharing identified  
620 peptides appeared in all the protein members. Proteins identified from SwissProt protein  
621 sequence database (i.e. one manually inspected protein sequence per gene symbol,  
622 excluding isoforms, splicing variants and theoretical protein sequences) are called  
623 “SwissProt proteins”. The proteotypic protein refers to a protein which is identified by  
624 proteotypic peptides which only appear in one SwissProt protein sequence.

625

## 626 **Validation of representative proteins using parallel reaction monitoring (PRM)**

627 PRM quantification strategy was used to further validate proteins that were measured  
628 by DIA quantification above. Biognosys-11 iRT peptides (Biognosys, Schlieren, CH) were  
629 spiked into peptide samples at the final concentration of 10% prior to MS injection for RT  
630 calibration. Peptides were separated at 300 nL/min along a 60min 7–35% linear LC gradient  
631 (buffer A: 20% ACN, 0.1% formic acid; buffer B: 20% ACN, 0.1% formic acid). The Orbitrap  
632 Fusion Lumos Tribrid mass spectrometer was operated in the MS/MS mode with time-  
633 scheduled acquisition for 100 peptides in a +/- 5 min retention time window. The individual  
634 isolation window was set at 1.2 Th. The full MS mode was measured at resolution 60,000 at  
635 m/z 200 in the Orbitrap, with AGC target value of 4E5 and maximum IT of 50ms. Target ions  
636 were submitted to MS/MS in the HCD cell (1.2 amu isolation width, 30% normalized collision  
637 energy). MS/MS spectra were acquired at resolution 30,000 (at m/z 200) in the Orbitrap  
638 using AGC target value of 1E5, a max IT of 100ms.

639

## 640 **AVAILABILITY**

641 Computational pipeline as a Docker container and DPHL as .tsv flat file initiative is available  
642 in the OneDrive website ([https://westlakeu-  
643 my.sharepoint.com/:f/g/personal/zhutiansheng\\_westlake\\_edu\\_cn/En-CNWLzaAxCja-L8Jze-  
644 6cBLHi7FTeIJNLnNcRMQachH5g?e=WOKizE](https://westlakeu-my.sharepoint.com/:f/g/personal/zhutiansheng_westlake_edu_cn/En-CNWLzaAxCja-L8Jze-6cBLHi7FTeIJNLnNcRMQachH5g?e=WOKizE))

645

## 646 **ACCESSION NUMBERS**

647 All the DDA files, DIA-MS Data files, original peptides, and protein results are deposited in  
648 iProX; the Project ID is IPX0001400000 and can be accessed via  
649 <http://www.iprox.org/page/PSV023.html?url=1542762994917ZL13>. All data and codes will  
650 be publicly released upon publication.

651

## 652 **SUPPLEMENTARY DATA**

653 Supplementary Data are available at NAR online.

654

## 655 **ACKNOWLEDGEMENTS**

656 The authors thank all collaborators who participated in the procurement of the clinical  
657 specimens.

658

## 659 **FUNDING**

660 The research is mainly supported by the Zhejiang Provincial Natural Science Foundation  
661 (Grant No. LR19C050001); Hangzhou Agriculture and Society Advancement Program (Grant  
662 No. 20190101A04); Westlake Startup Grant; research funds from National Cancer Centre  
663 Singapore and Singapore General Hospital; the National Key R&D Program of China  
664 (2016YFC0901704); Zhejiang Innovation Discipline Project of Laboratory Animal Genetic  
665 Engineering (No. 201510); the Netherlands Cancer Society (NKI 2014-6651); and NWO-  
666 Middelgroot (project number 91116017). Cancer Center Amsterdam is acknowledged for  
667 support of the mass spectrometry infrastructure at Amsterdam UMC.

668

## 669 **CONFLICT OF INTEREST**

670 The research group of T.G. is supported by Thermo Fisher, which provided access to  
671 prototype instrumentation, and Pressure Biosciences Inc, which provided access to  
672 advanced sample preparation instrumentation. Y.X., M.H. and Y.Z. are employees of  
673 Thermo Fisher. The remaining authors declare no competing interests.

674

## 675 **REFERENCES**

- 676 [1] Schubert OT, Gillet LC, Collins BC, Navarro P, Rosenberger G, Wolski WE, et al. Building high-  
677 quality assay libraries for targeted analysis of SWATH MS data. *Nat Protoc* 2015;10:426-41.  
678 [2] Sandhu C, Qureshi A, Emili A. Panomics for Precision Medicine. *Trends Mol Med* 2018;24:85-  
679 101.  
680 [3] Aronson SJ, Rehm HL. Building the foundation for genomics in precision medicine. *Nature*  
681 2015;526:336-42.  
682 [4] Yang JY, Sarwal MM. Transplant genetics and genomics. *Nat Rev Genet* 2017;18:309-26.  
683 [5] Zhang B, Wang J, Wang X, Zhu J, Liu Q, Shi Z, et al. Proteogenomic characterization of human  
684 colon and rectal cancer. *Nature* 2014;513:382-7.  
685 [6] Bosch LJW, de Wit M, Pham TV, Coupe VMH, Hiemstra AC, Piersma SR, et al. Novel Stool-  
686 Based Protein Biomarkers for Improved Colorectal Cancer Screening: A Case-Control Study. *Ann*  
687 *Intern Med* 2017;167:855-66.  
688 [7] Mertins P, Mani DR, Ruggles KV, Gillette MA, Clauser KR, Wang P, et al. Proteogenomics  
689 connects somatic mutations to signalling in breast cancer. *Nature* 2016;534:55-62.  
690 [8] Zhang H, Liu T, Zhang Z, Payne SH, Zhang B, McDermott JE, et al. Integrated Proteogenomic  
691 Characterization of Human High-Grade Serous Ovarian Cancer. *Cell* 2016;166:755-65.  
692 [9] Ge S, Xia X, Ding C, Zhen B, Zhou Q, Feng J, et al. A proteomic landscape of diffuse-type gastric  
693 cancer. *Nat Commun* 2018;9:1012.  
694 [10] Zhu Y, Guo T. Towards a one-stop solution for large-scale proteomics data analysis. *Sci China*  
695 *Life Sci* 2018;61:351-4.  
696 [11] Cominetti O, Nunez Galindo A, Corthesy J, Valsesia A, Irincheeva I, Kussmann M, et al. Obesity  
697 shows preserved plasma proteome in large independent clinical cohorts. *Sci Rep* 2018;8:16981.

- 698 [12] Gillet LC, Navarro P, Tate S, Rost H, Selevsek N, Reiter L, et al. Targeted data extraction of the  
699 MS/MS spectra generated by data-independent acquisition: a new concept for consistent and accurate  
700 proteome analysis. *Mol Cell Proteomics* 2012;11:O111 016717.
- 701 [13] Guo T, Kouvonen P, Koh CC, Gillet LC, Wolski WE, Rost HL, et al. Rapid mass spectrometric  
702 conversion of tissue biopsy samples into permanent quantitative digital proteome maps. *Nat Med*  
703 2015;21:407-13.
- 704 [14] Röst HL, Rosenberger G, Navarro P, Gillet L, Miladinovic SM, Schubert OT, et al.  
705 OpenSWATH enables automated, targeted analysis of data-independent acquisition MS data. *Nat*  
706 *Biotechnol* 2014;32:219-23.
- 707 [15] Navarro P, Kuharev J, Gillet LC, Bernhardt OM, MacLean B, Rost HL, et al. A multicenter study  
708 benchmarks software tools for label-free proteome quantification. *Nat Biotechnol* 2016;34:1130-6.
- 709 [16] Tsou CC, Avtonomov D, Larsen B, Tucholska M, Choi H, Gingras AC, et al. DIA-Umpire:  
710 comprehensive computational framework for data-independent acquisition proteomics. *Nat Methods*  
711 2015;12:258-64, 7 p following 64.
- 712 [17] Li Y, Zhong CQ, Xu X, Cai S, Wu X, Zhang Y, et al. Group-DIA: analyzing multiple data-  
713 independent acquisition mass spectrometry data files. *Nat Methods* 2015;12:1105-6.
- 714 [18] MacLean B, Tomazela DM, Shulman N, Chambers M, Finney GL, Frewen B, et al. Skyline: an  
715 open source document editor for creating and analyzing targeted proteomics experiments.  
716 *Bioinformatics* 2010;26:966-8.
- 717 [19] Bruderer R, Bernhardt OM, Gandhi T, Miladinovic SM, Cheng LY, Messner S, et al. Extending  
718 the limits of quantitative proteome profiling with data-independent acquisition and application to  
719 acetaminophen-treated three-dimensional liver microtissues. *Mol Cell Proteomics* 2015;14:1400-10.
- 720 [20] Rosenberger G, Koh CC, Guo T, Rost HL, Kouvonen P, Collins BC, et al. A repository of assays  
721 to quantify 10,000 human proteins by SWATH-MS. *Sci Data* 2014;1:140031.
- 722 [21] Rosenberger G, Bludau I, Schmitt U, Heusel M, Hunter CL, Liu Y, et al. Statistical control of  
723 peptide and protein error rates in large-scale targeted data-independent acquisition analyses. *Nat*  
724 *Methods* 2017;14:921-7.
- 725 [22] Liu Y, Buil A, Collins BC, Gillet LC, Blum LC, Cheng LY, et al. Quantitative variability of 342  
726 plasma proteins in a human twin population. *Mol Syst Biol* 2015;11:786.
- 727 [23] Guo T, Li L, Zhong Q, Rupp NJ, Charmpi K, Wong CE, et al. Multi-region proteome analysis  
728 quantifies spatial heterogeneity of prostate tissue biomarkers. *Life Sci Alliance* 2018;1.
- 729 [24] Zhu Y, Zhu J, Lu C, Zhang Q, Xie W, Sun P, et al. Identification of Protein Abundance Changes  
730 in Hepatocellular Carcinoma Tissues Using PCT-SWATH. *Proteomics Clin Appl* 2018:e1700179.
- 731 [25] Muntel J, Xuan Y, Berger ST, Reiter L, Bachur R, Kentsis A, et al. Advancing Urinary Protein  
732 Biomarker Discovery by Data-Independent Acquisition on a Quadrupole-Orbitrap Mass Spectrometer.  
733 *J Proteome Res* 2015;14:4752-62.
- 734 [26] Meyer JG, Schilling B. Clinical applications of quantitative proteomics using targeted and  
735 untargeted data-independent acquisition techniques. *Expert Rev Proteomics* 2017;14:419-29.
- 736 [27] Chambers MC, Maclean B, Burke R, Amodei D, Ruderman DL, Neumann S, et al. A cross-  
737 platform toolkit for mass spectrometry and proteomics. *Nat Biotechnol* 2012;30:918-20.
- 738 [28] Li D, Fu Y, Sun R, Ling CX, Wei Y, Zhou H, et al. pFind: a novel database-searching software  
739 system for automated peptide and protein identification via tandem mass spectrometry.  
740 *Bioinformatics* 2005;21:3049-50.
- 741 [29] Lam H, Deutsch EW, Eddes JS, Eng JK, King N, Stein SE, et al. Development and validation of  
742 a spectral library searching method for peptide identification from MS/MS. *Proteomics* 2007;7:655-67.
- 743 [30] Parker SJ, Rost H, Rosenberger G, Collins BC, Malmstrom L, Amodei D, et al. Identification of  
744 a Set of Conserved Eukaryotic Internal Retention Time Standards for Data-independent Acquisition  
745 Mass Spectrometry. *Mol Cell Proteomics* 2015;14:2800-13.
- 746 [31] Escher C, Reiter L, MacLean B, Ossola R, Herzog F, Chilton J, et al. Using iRT, a normalized  
747 retention time for more targeted measurement of peptides. *Proteomics* 2012;12:1111-21.
- 748 [32] Cox J, Mann M. MaxQuant enables high peptide identification rates, individualized p.p.b.-range  
749 mass accuracies and proteome-wide protein quantification. *Nat Biotechnol* 2008;26:1367-72.
- 750 [33] Eid S, Turk S, Volkamer A, Rippmann F, Fulle S. KinMap: a web-based tool for interactive  
751 navigation through human kinome data. *BMC Bioinformatics* 2017;18:16.

- 752 [34] Lambert SA, Jolma A, Campitelli LF, Das PK, Yin Y, Albu M, et al. The Human Transcription  
753 Factors. *Cell* 2018;172:650-65.
- 754 [35] Krijthe JH. Rtsne: T-Distributed Stochastic Neighbor Embedding using a Barnes-Hut  
755 Implementation 2015.
- 756 [36] Tripathi S, Pohl MO, Zhou Y, Rodriguez-Frandsen A, Wang G, Stein DA, et al. Meta- and  
757 Orthogonal Integration of Influenza "OMICS" Data Defines a Role for UBR4 in Virus Budding. *Cell*  
758 *Host Microbe* 2015;18:723-35.
- 759 [37] Huang da W, Sherman BT, Lempicki RA. Systematic and integrative analysis of large gene lists  
760 using DAVID bioinformatics resources. *Nat Protoc* 2009;4:44-57.
- 761 [38] Shurbaji MS, Kalbfleisch JH, Thurmond TS. Immunohistochemical detection of a fatty acid  
762 synthase (OA-519) as a predictor of progression of prostate cancer. *Hum Pathol* 1996;27:917-21.
- 763 [39] Xin H, Liu D, Wan M, Safari A, Kim H, Sun W, et al. TPP1 is a homologue of ciliate TEBP-beta  
764 and interacts with POT1 to recruit telomerase. *Nature* 2007;445:559-62.
- 765 [40] Nandakumar J, Bell CF, Weidenfeld I, Zaugg AJ, Leinwand LA, Cech TR. The TEL patch of  
766 telomere protein TPP1 mediates telomerase recruitment and processivity. *Nature* 2012;492:285-9.
- 767 [41] Sexton AN, Regalado SG, Lai CS, Cost GJ, O'Neil CM, Urnov FD, et al. Genetic and molecular  
768 identification of three human TPP1 functions in telomerase action: recruitment, activation, and  
769 homeostasis set point regulation. *Genes Dev* 2014;28:1885-99.
- 770 [42] Mocellin S, Pooley KA, Nitti D. Telomerase and the search for the end of cancer. *Trends Mol*  
771 *Med* 2013;19:125-33.
- 772 [43] Heaphy CM, Meeker AK. The potential utility of telomere-related markers for cancer diagnosis.  
773 *J Cell Mol Med* 2011;15:1227-38.
- 774 [44] Qian X, Li C, Pang B, Xue M, Wang J, Zhou J. Spondin-2 (SPON2), a more prostate-cancer-  
775 specific diagnostic biomarker. *PLoS One* 2012;7:e37225.
- 776 [45] Lucarelli G, Rutigliano M, Bettocchi C, Palazzo S, Vavallo A, Galleggiante V, et al. Spondin-2,  
777 a secreted extracellular matrix protein, is a novel diagnostic biomarker for prostate cancer. *J Urol*  
778 2013;190:2271-7.
- 779 [46] Steuber T, O'Brien MF, Lilja H. Serum markers for prostate cancer: a rational approach to the  
780 literature. *Eur Urol* 2008;54:31-40.
- 781 [47] Cao Y, Shi YX, Chen JO, Tan YT, Cai YC, Luo HY, et al. Serum C-reactive protein as an  
782 important prognostic variable in patients with diffuse large B cell lymphoma. *Tumour Biol*  
783 2012;33:1039-44.
- 784 [48] Tzankov A, Pehrs AC, Zimpfer A, Ascani S, Lugli A, Pileri S, et al. Prognostic significance of  
785 CD44 expression in diffuse large B cell lymphoma of activated and germinal centre B cell-like types:  
786 a tissue microarray analysis of 90 cases. *J Clin Pathol* 2003;56:747-52.
- 787 [49] Ling JY, Sun XF, Zhang X, Zhen ZJ, Xia Y, Luo WB, et al. [Dynamic changes of serum  
788 proteomic spectra in patients with non-Hodgkin's lymphoma (NHL) before and after chemotherapy  
789 and screening of candidate biomarkers for NHL]. *Ai Zheng* 2008;27:1065-9.
- 790 [50] Jimenez CR, Zhang H, Kinsinger CR, Nice EC. The cancer proteomic landscape and the HUPO  
791 Cancer Proteome Project. *Clin Proteomics* 2018;15:4.
- 792 [51] Rost HL, Liu Y, D'Agostino G, Zanella M, Navarro P, Rosenberger G, et al. TRIC: an automated  
793 alignment strategy for reproducible protein quantification in targeted proteomics. *Nat Methods*  
794 2016;13:777-83.

795

796



797 **TABLE AND FIGURES LEGENDS**

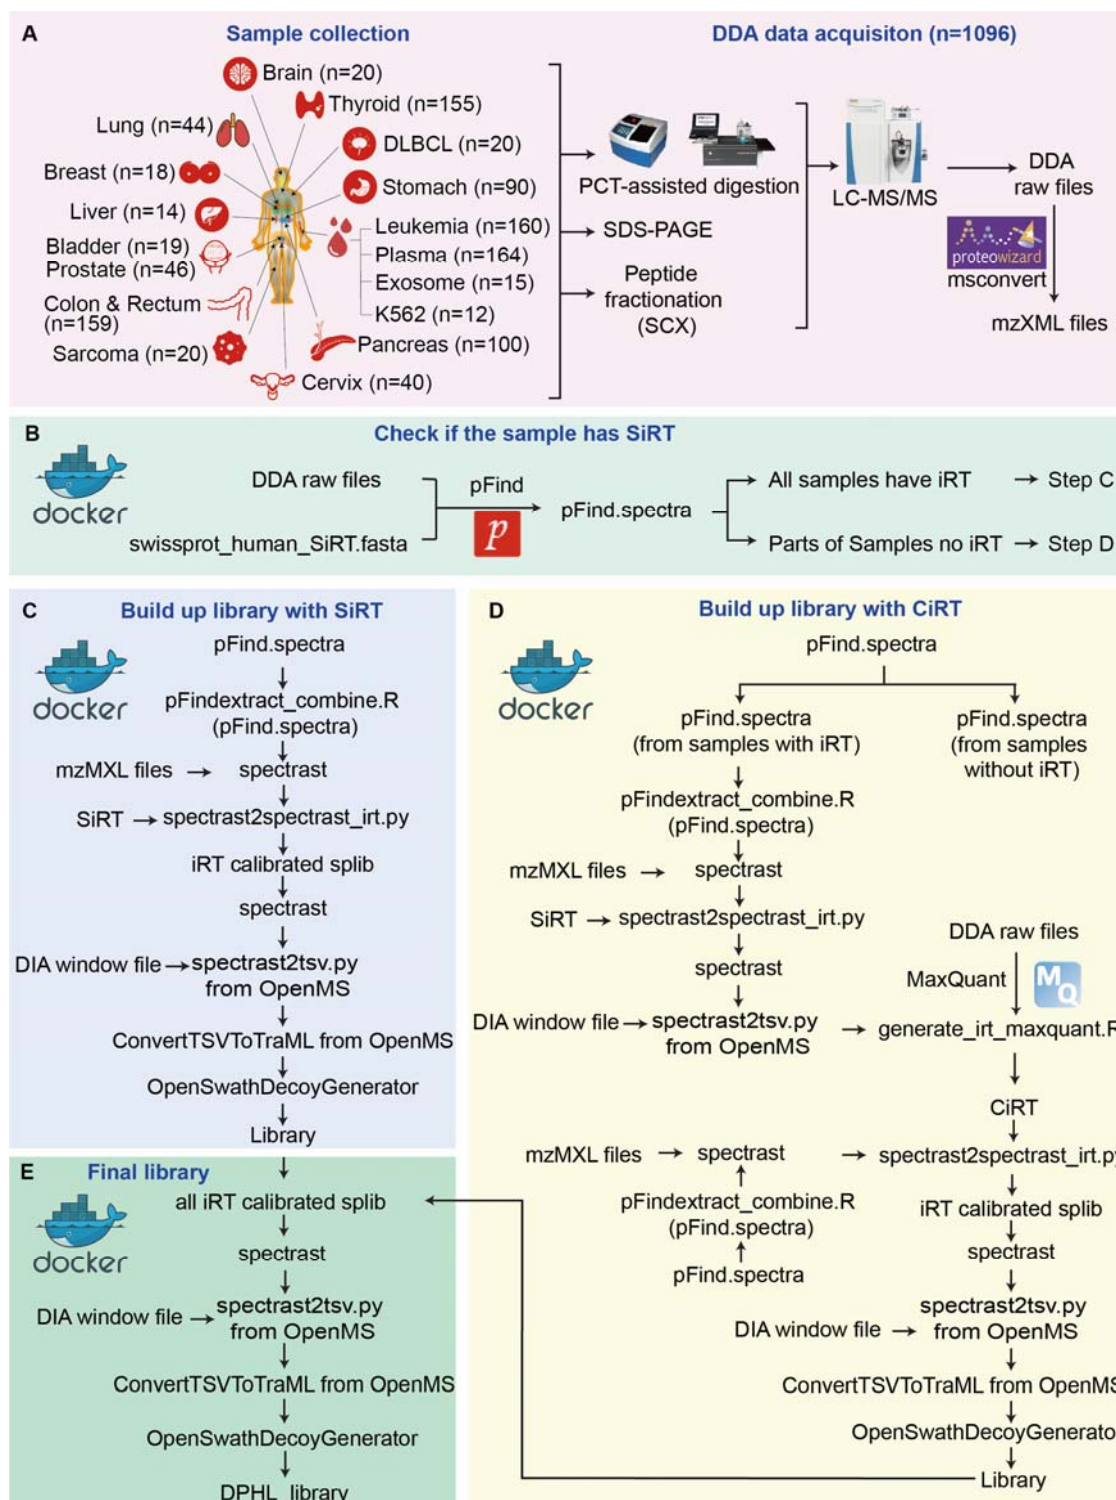

798 **Figure 1. Workflow for building the DPHL.** (A) Schematic representation of DDA shotgun  
 799 proteomics data acquisition. Numbers in parentheses indicate the number of DDA files per  
 800 tissue type. B-E. Computational pipeline for building DIA spectral library. (B) Protein  
 801 identification and iRT detection from DDA raw files using pFind. (C) SiRT detection and  
 802 calibration. (D) CiRT detection and calibration. (E) Generation of the DPHL library. Details of  
 803 the commands are presented in Supplementary Note 1.  
 804

805

806

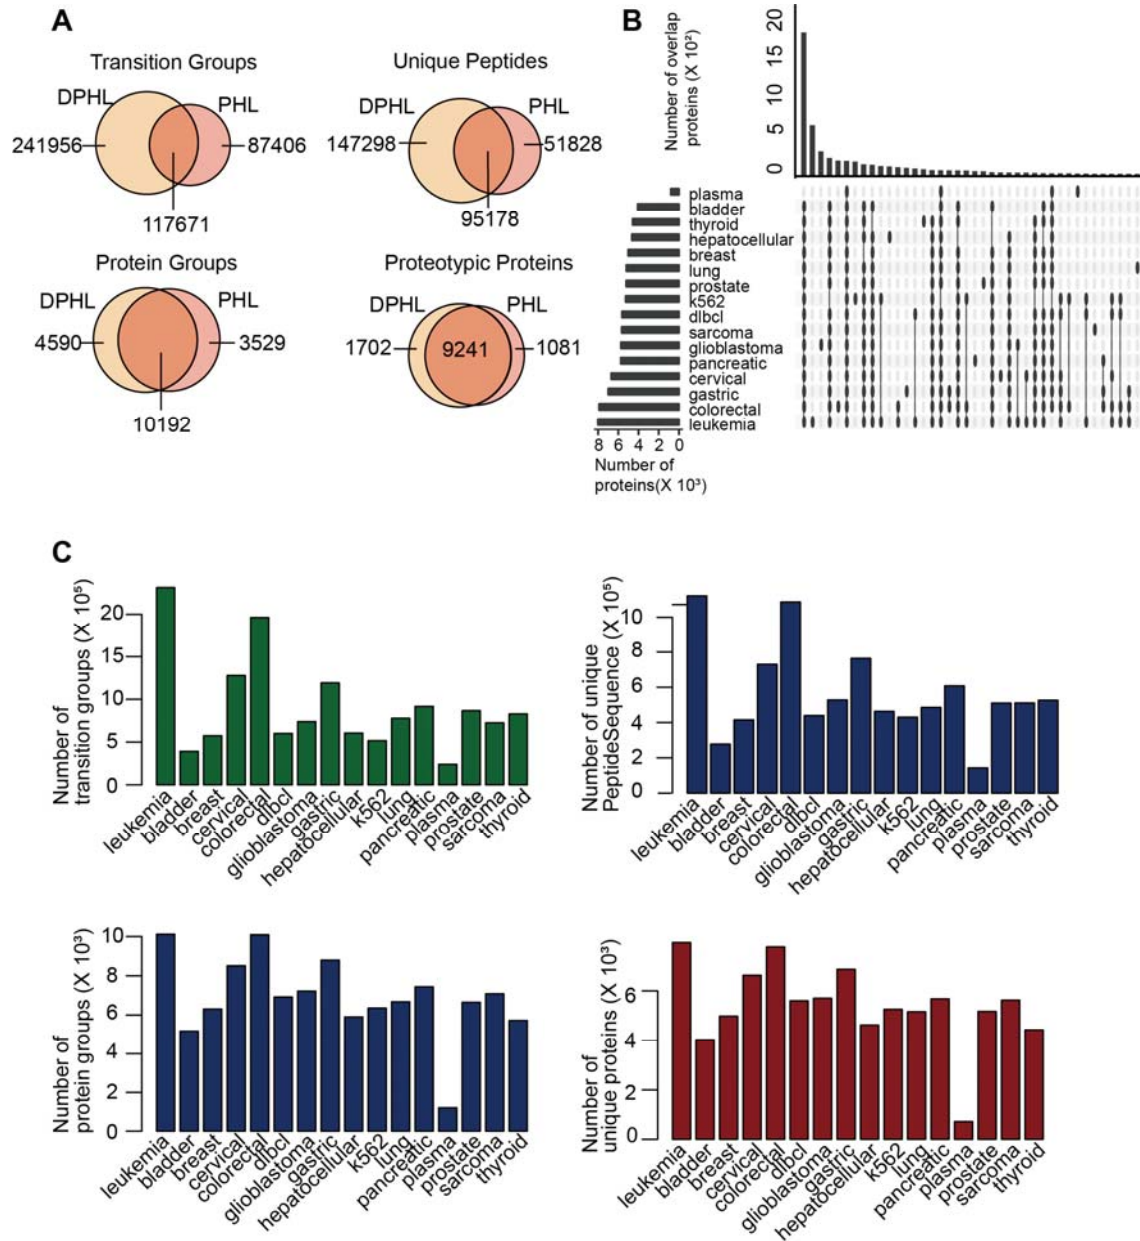

807

808 **Figure 2. Comparison of DPHL and PHL.** (A) Venn diagram showing the comparison of  
 809 transition groups, unique peptide sequences, protein groups, and proteins in DPHL and PHL.  
 810 (B) Visualization of set intersections using R package UpSet. (C) The bar plots display the  
 811 number of transition groups (peptide precursors), unique peptide sequences, protein groups,  
 812 proteotypic SwissProt proteins in DPHL library for each sample type.

813

814

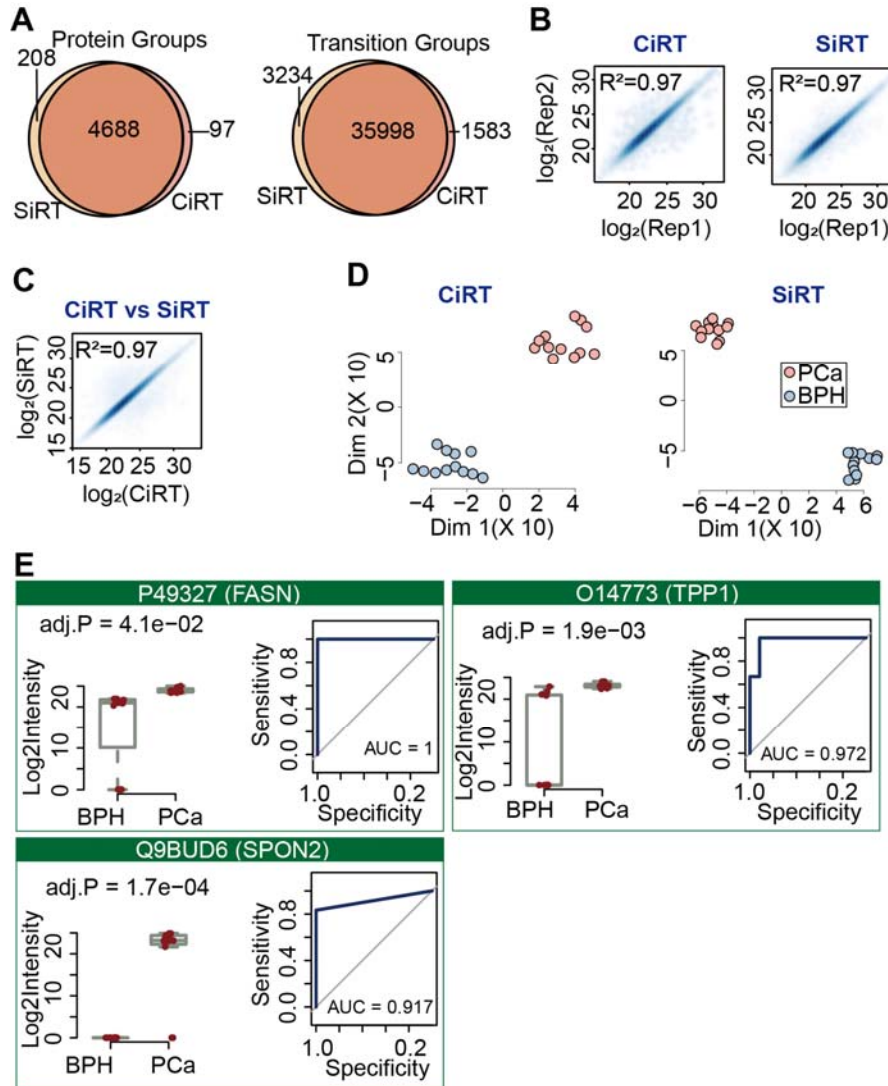

815

816 **Figure 3. Prostate cancer proteome using 60-min gradient DIA.** (A) Peptide and protein  
817 identification using SiRT and CiRT. (B) Technical reproducibility of proteome matrix using  
818 CiRT and SiRT. (C) Comparison of quantified peptide precursors using the SiRT and CiRT  
819 methods. (D) 2D plane t-SNE plot of disease classes, color coded by sample type using  
820 CiRT and SiRT. (E) Boxplots and ROC curves showing the significantly dysregulated  
821 proteins; p-values are shown under each protein name.

822

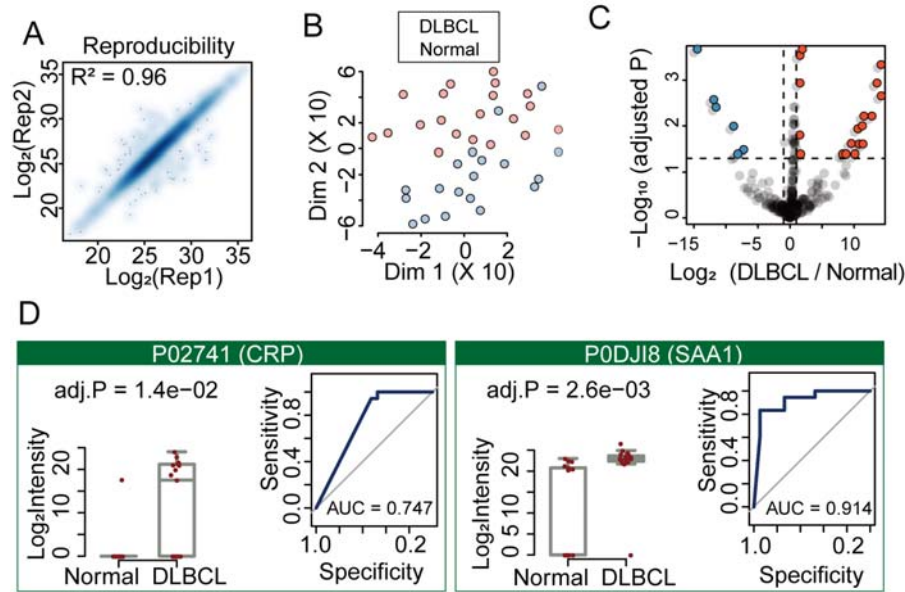

823

824

**Figure 4. DIA analysis of plasma samples from DLBCL patients and healthy subjects.**

825

(A) 2D plane t-SNE plot showing the proteomes are separated. (B) Volcano plot showing

826

significantly down-regulated (blue) and up-regulated (red) proteins in the 37 plasma samples.

827

(C) Technical reproducibility for protein quantification of four plasma samples from DLBCL

828

patients and healthy subjects. (D) Each box shows the expression of a protein biomarker

829

candidate. Left panel: boxplots show the expression difference with P values computed

830

using Student's *t* test adjusted by the Benjamini-Hochberg method. Right panel: ROC curves

831

of the respective dysregulated protein.

832



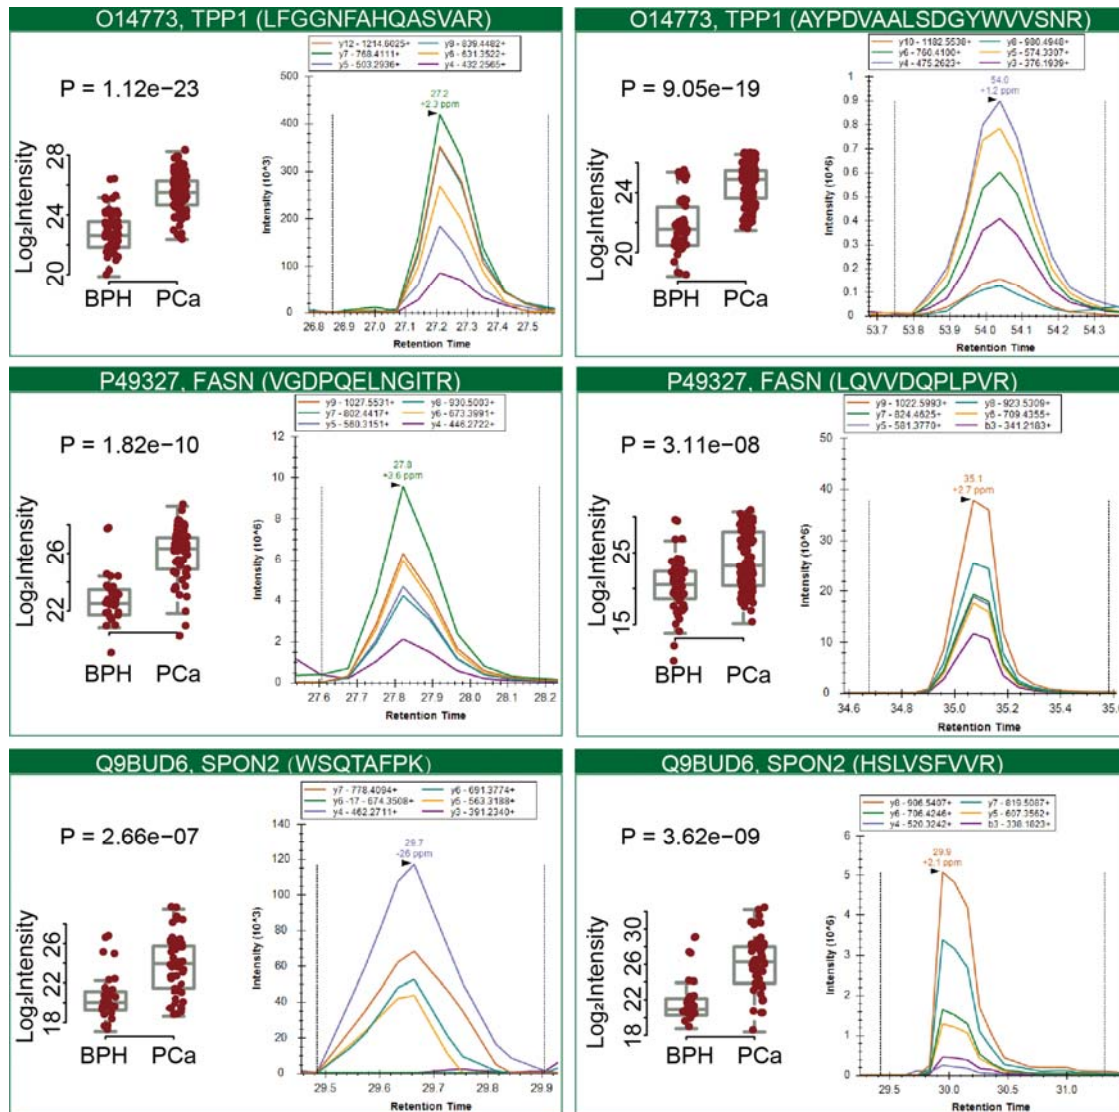

833

834

835

836

837

838

**Figure 5. PRM validation of eight peptides in 73 prostate samples.** In each box, the left panel shows the log<sub>2</sub> intensity of eight representative peptides across 73 prostate samples, while the right panel depicts a representative peak group for the respective peptide. P values are computed using Student's *t* test.
